# Supplementary material
Source: MDPI journal article supplement (https://www.mdpi.com/1424-8247/14/11/1146)
Supplement: s1 [file s1]

## HPLC-UV-MS analysis of hydro-alcoholic propolis extract

The UV quantitation is made only if there is a match with MS spectra AND if the UV signal allows quantitation ( $S/N > 5$ ). For gentisic acid, hyperoside and myricetin those criteria were not met, so only qualitative results were provided. The UV, together with corresponding MS chromatograms for the 3 compounds (aligned to time axis) are shown below: (chromatograms presented: UV, MS-gentisic acid, MS-myricitol, MS-hyperoside).

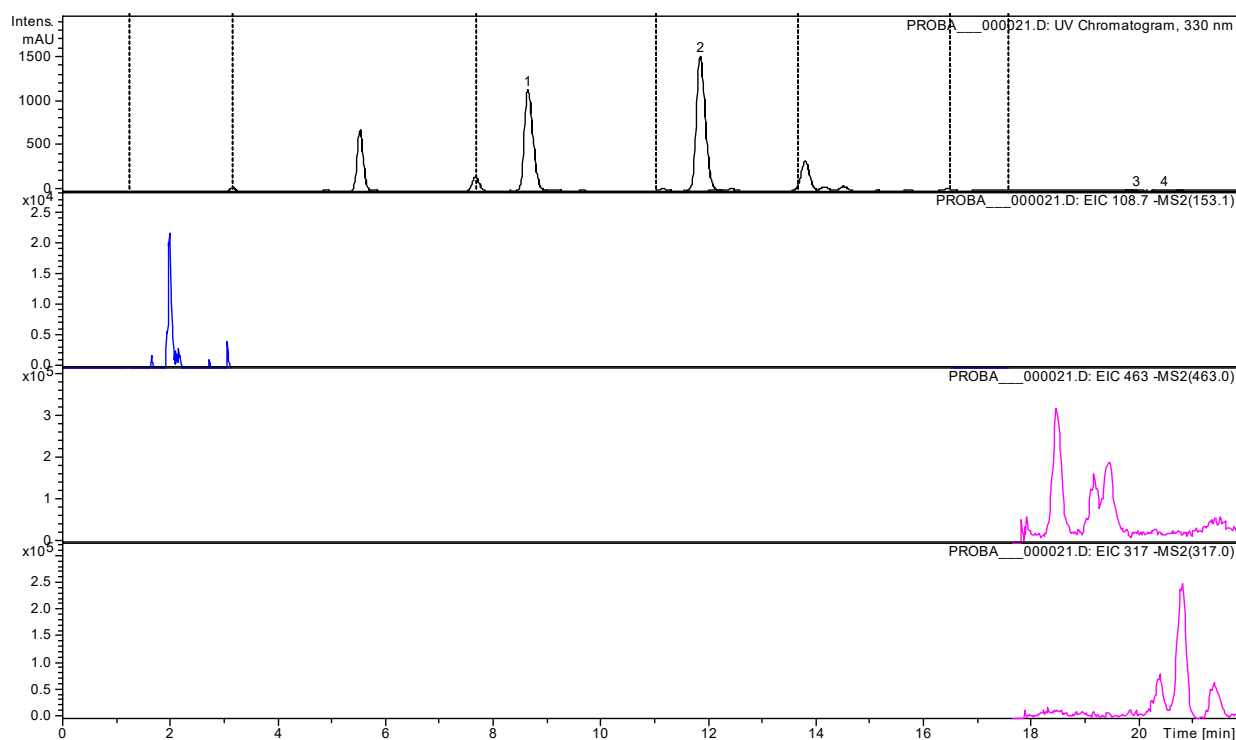

**Figure S1.** UV and MS chromatograms of gentisic acid, myricitol and hyperoside

HPLC-UV-MS analysis of oily propolis extract and honey sample

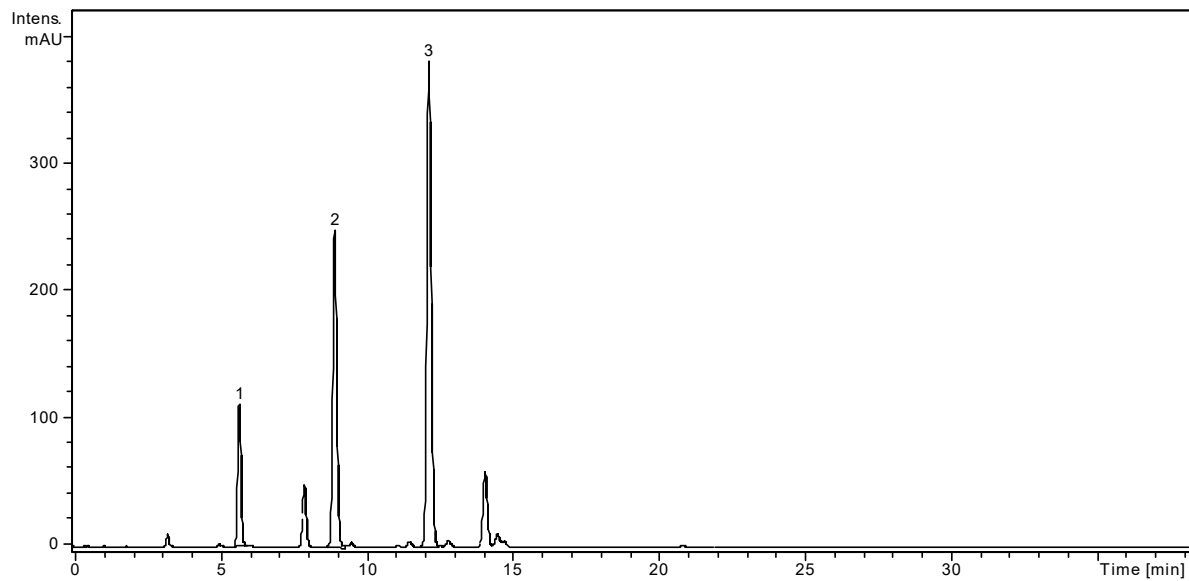

**Figure S2.** HPLC chromatogram of oily propolis extract (1-caffeic acid, 2-p-coumaric acid, 3-ferulic acid)

**Table S1.** Polyphenolic compounds identified in the oily propolis extract

| No. on chromatogram | Compound        | UV Identified | MS qualitatively identified | Concentration (µg/ml) |
|---------------------|-----------------|---------------|-----------------------------|-----------------------|
|                     | Gentisic acid   | NO            | YES                         | qualitatively         |
| 1                   | Caffeic acid    | YES           | YES                         | 19.129 ± 0.95         |
| 2                   | p-coumaric acid | YES           | YES                         | 71.661 ± 2.86         |
| 3                   | Ferulic acid    | YES           | YES                         | 99.600 ± 2.98         |

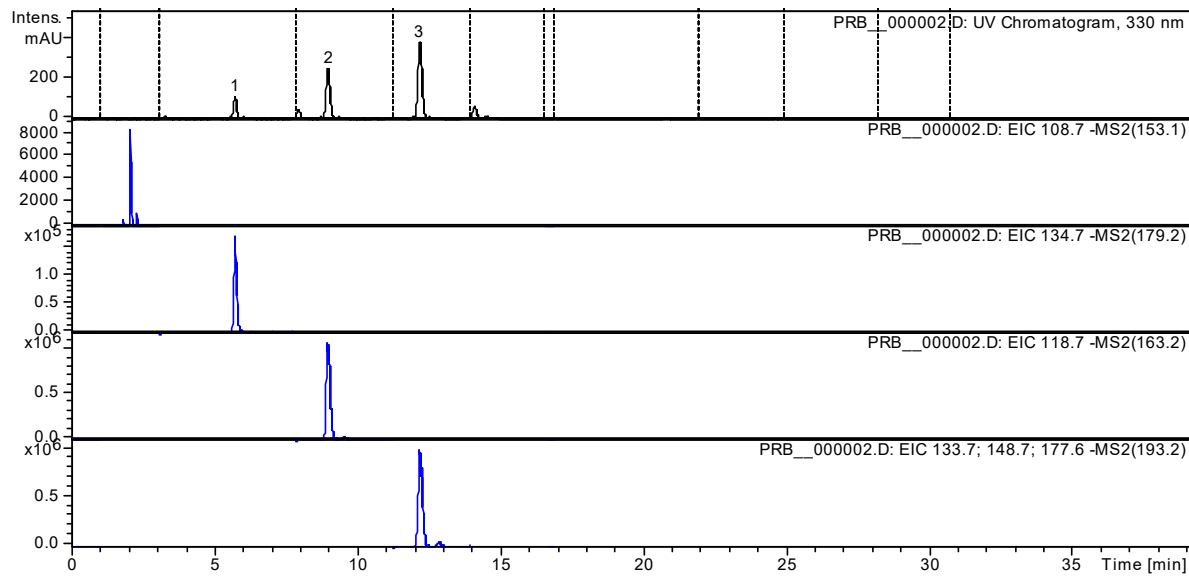

**Figure S3.** UV and MS chromatograms of identified compounds in the oily propolis extract

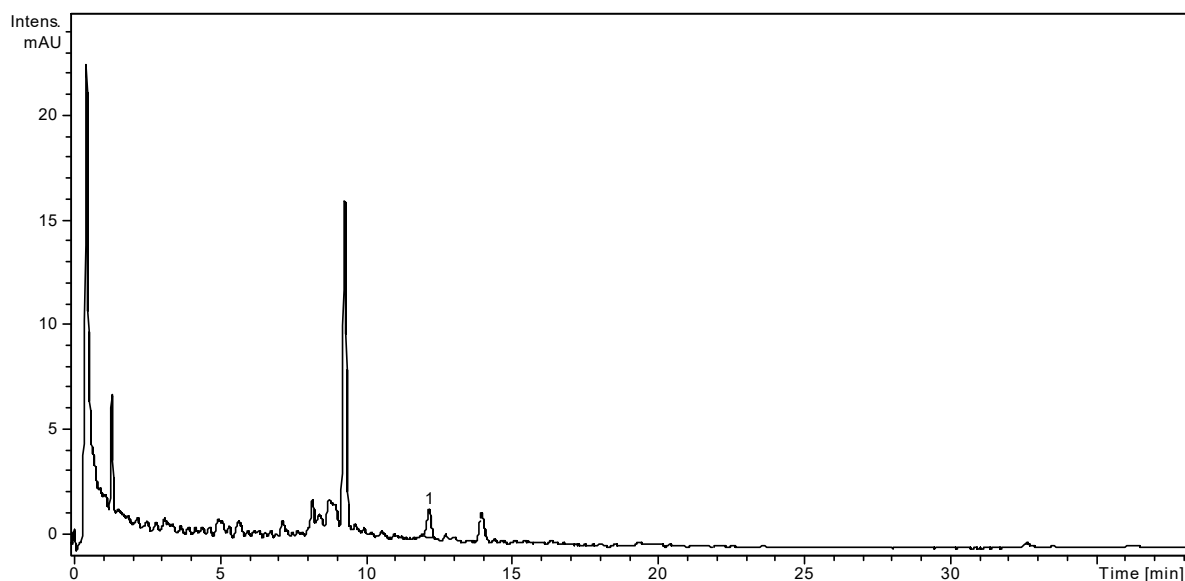

**Figure S4.** HPLC chromatogram of honey sample (1-gentisic acid, qualitatively identified)

**Table S2.** Organoleptic analysis and physico-chemical determination of honey – Bulletin no. 945/12.12.2016 (ICDA Bucharest - Research and Development Institute for Beekeeping)

| Organoleptic properties of honey | Methods of analysis | Results                                              |
|----------------------------------|---------------------|------------------------------------------------------|
| appearance                       | SR 784 / 3-2009     | clean, homogeneous, without impurities, without foam |
| consistency                      | SR 784 / 3-2009     | viscous mass, crystallized with coarse crystals      |
| color                            | SR 784 / 3-2009     | yellow                                               |
| taste and odor                   | SR 784 / 3-2009     | sweet taste, with a pleasant floral aroma            |

| Physico-chemical determinations of honey | Methods of analysis                               | Results                           |
|------------------------------------------|---------------------------------------------------|-----------------------------------|
| free acidity                             | LCPA // DFC-PS-02 SR 784 / 3-2009 point 4.3       | $2.20 \pm 0.351$ mL NaOH 1N/100 g |
| reducing sugar expressed as invert sugar | LCPA // DFC-PS-06 // Elser SR 784 / 3-2009 pt.4.4 | $74.50 \pm 0.7806$ %, g/g         |

|                                                |                                                                   |                            |
|------------------------------------------------|-------------------------------------------------------------------|----------------------------|
| easily hydrolysable sugar expressed as sucrose | LCPA // DFC-PS-07 // Elser SR 784 / 3-2009 point 4.5              | 1.90 ± 0.1522 %, g/g       |
| hydroxymethylfurfural                          | LCPA // DFC-PS-03 // Winkler SR 784 / 3-2009 point 4.9            | 1.44 ± 0.1713 mg/100 g     |
| diastase index                                 | LCPA // DFC-PS-05 // Gothe SR 784 / 3-2009 pt.4.7                 | 29.40 ± 0.3596 Gothe units |
| ash                                            | LCPA // DFC-PS-09                                                 | 0.1022 ± 0.008 %, g/g      |
| water                                          | LCPA // DFC-PS-16 // refractometric method SR 784 / 3-2009 pt.4.1 | 14.80 ± 0.2828 %, g/g      |

**Table S3.** Physico-chemical determination of apilarnil – Bulletin no. 947/12.12.2016 (ICDA Bucharest - Research and Development Institute for Beekeeping)

| Physico-chemical determinations of apilarnil | Methods of analysis                     | Results                 |
|----------------------------------------------|-----------------------------------------|-------------------------|
| total proteins                               | LCPA // DFC-PS-10                       | 7.5551 ± 0.5130 %, g/g  |
| total fats                                   | LCPA // DFC-PS-07 // Soxhlet            | 6.3916 ± 0.2788 %, g/g  |
| ash                                          | LCPA // DFC-PS-09                       | 0.7508 ± 0.008 %, g/g   |
| water                                        | LCPA//DFC-PS-12<br>//oven drying method | 71.4706 ± 0.8388 %, g/g |

Determination of vitamin C in honey sample was performed using a titrimetric method according to Association of Official Analytical Chemists. Vitamin C in Juices and Vitamin Preparations. Official Method 967.21. In AOAC Official Methods of Analysis, 18th; Association of Official Analytical Chemists: Gaithersburg, MD, USA, 2005; pp 45.1.14.

Result: 1.54 ± 0.08 mg/100 g honey
